# Supplementary material
Source: publisher figshare collection journal article supplement (https://acs.figshare.com/ndownloader/files/7785910)
Supplement: Supplementary file 1 [file 7785910]

## Supporting Information

### **Niobium-doped (001) Dominated Anatase TiO<sub>2</sub> Nanosheets as Photoelectrode for Efficient Dye-Sensitized Solar Cells**

Lei Jiang,<sup>‡ †</sup> Lei Sun,<sup>‡ †</sup> Dong Yang,<sup>§</sup> Jian Zhang,<sup>§</sup> Ya-Juan Li<sup>†</sup> and Wei-Qiao Deng,<sup>\* †</sup>

<sup>†</sup>State Key Laboratory of Molecular Reaction Dynamics, Dalian Institute of Chemical Physics, Chinese Academy of Sciences, Dalian 116023, China.

<sup>§</sup>State Key Laboratory of Catalysis, Dalian National Laboratory for Clean Energy, Dalian Institute of Chemical Physics, Chinese Academy of Sciences, Dalian 116023, China

<sup>‡</sup> These authors contributed equally to this work.

\*Corresponding authors:

dengwq@dicp.ac.cn

**Table S1.** Calculated bond length between bonded surface Ti atom of the TiO<sub>2</sub> surface and dye O atom in the carboxylic group. (unit in Å)

|                 | Bond I | Bond II | Bond III    |
|-----------------|--------|---------|-------------|
| N719+(101)      | 1.922  | 2.017   | 1.954       |
| N719+(101)-Nb-T | 1.892  | 1.984   | 1.925       |
| N719+(101)-Nb-B | 1.904  | 1.990   | 1.937       |
| N719+(100)      | 1.958  | 1.972   | 2.314/2.051 |
| N719+(100)-Nb-T | 1.940  | 1.953   | 2.309/2.033 |
| N719+(100)-Nb-B | 1.949  | 1.963   | 2.329/2.038 |
| N719+(001)      | 1.973  | 2.079   | 2.080/2.206 |
| N719+(001)-Nb-T | 1.962  | 1.984   | 2.091/2.140 |
| N719+(001)-Nb-B | 1.964  | 1.984   | 2.069/2.145 |

**Table S2.** Surface properties of different TiO<sub>2</sub> surface – N719 dye systems.

| Surface  | Experiment          |                 |                             | Calculation                 |
|----------|---------------------|-----------------|-----------------------------|-----------------------------|
|          | BET                 | M <sub>Ru</sub> | N <sub>A</sub>              | N <sub>A</sub>              |
|          | (m <sup>2</sup> /g) | (mg/g)          | (molecule/nm <sup>2</sup> ) | (molecule/nm <sup>2</sup> ) |
| (101)    | 62.1                | 3.86            | 0.39                        | 0.24                        |
| (100)    | 53.5                | 3.82            | 0.45                        | 0.28                        |
| (001)    | 88.1                | 5.13            | 0.37                        | 0.28                        |
| Nb-(101) | 147.8               | 8.23            | 0.37                        | 0.24                        |
| Nb-(100) | 85.5                | 4.36            | 0.32                        | 0.28                        |
| Nb-(001) | 91.0                | 6.79            | 0.48                        | 0.28                        |

**Table S3.** Calculation: the percentage of active facets on TiO<sub>2</sub> nanosheets =  $2(\text{length} \times \text{width}) / (2(\text{length} \times \text{width}) + 2(\text{length} \times \text{thickness}) + 2(\text{width} \times \text{thickness}))$ .

| 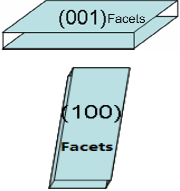 | Average<br>length (nm) | Average<br>width (nm) | Average<br>Thickness<br>(nm) | Percentage |
|-----------------------------------------------------------------------------------|------------------------|-----------------------|------------------------------|------------|
| (001)-TiO <sub>2</sub> -NS                                                        | ~47                    | ~47                   | ~5                           | ~82.5%     |
| Nb-(001)-TiO <sub>2</sub> -NS                                                     | ~50                    | ~50                   | ~5                           | ~83.3%     |
| (100)-TiO <sub>2</sub> -NS                                                        | ~110                   | ~30                   | ~4                           | ~85.5%     |
| Nb-(100)-TiO <sub>2</sub> -NS                                                     | ~150                   | ~35                   | ~4                           | ~87.6%     |

**Table S4.** Nb content in the TiO<sub>2</sub> nanosheets determined using ICP-OES, EDS measurement and the theoretical doping amount.

| samples                                       | Measurement |            | Theoretical Doping<br>(mol%) |
|-----------------------------------------------|-------------|------------|------------------------------|
|                                               | (mol%) ICP  | (mol%) EDS |                              |
| Nb-doped-(101)-TiO <sub>2</sub> nanoparticles | 2.51        | 3.0        | 2.50                         |
| Nb-doped-(100)-TiO <sub>2</sub> nanosheets    | 2.10        | 1.7        | 2.00                         |
| Nb-doped-(001)-TiO <sub>2</sub> nanosheets    | 2.52        | 2.2        | 2.00                         |

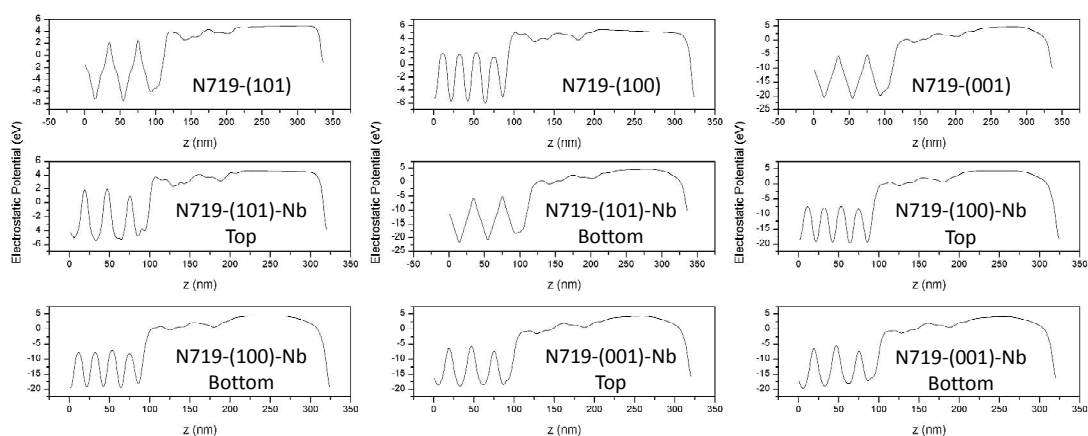

**Figure S1** Work function ( $WF$ ) of different  $TiO_2$  surface – N719 dye combined systems.

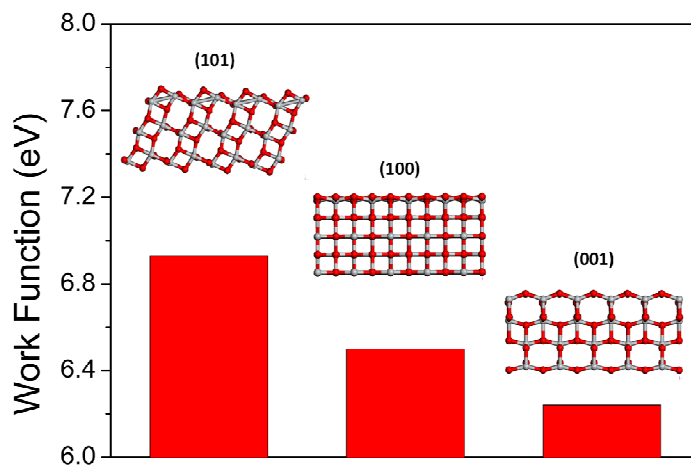

**Figure S2.** (101), (100) and (001) anatase surfaces with the work function level from DFT calculations.

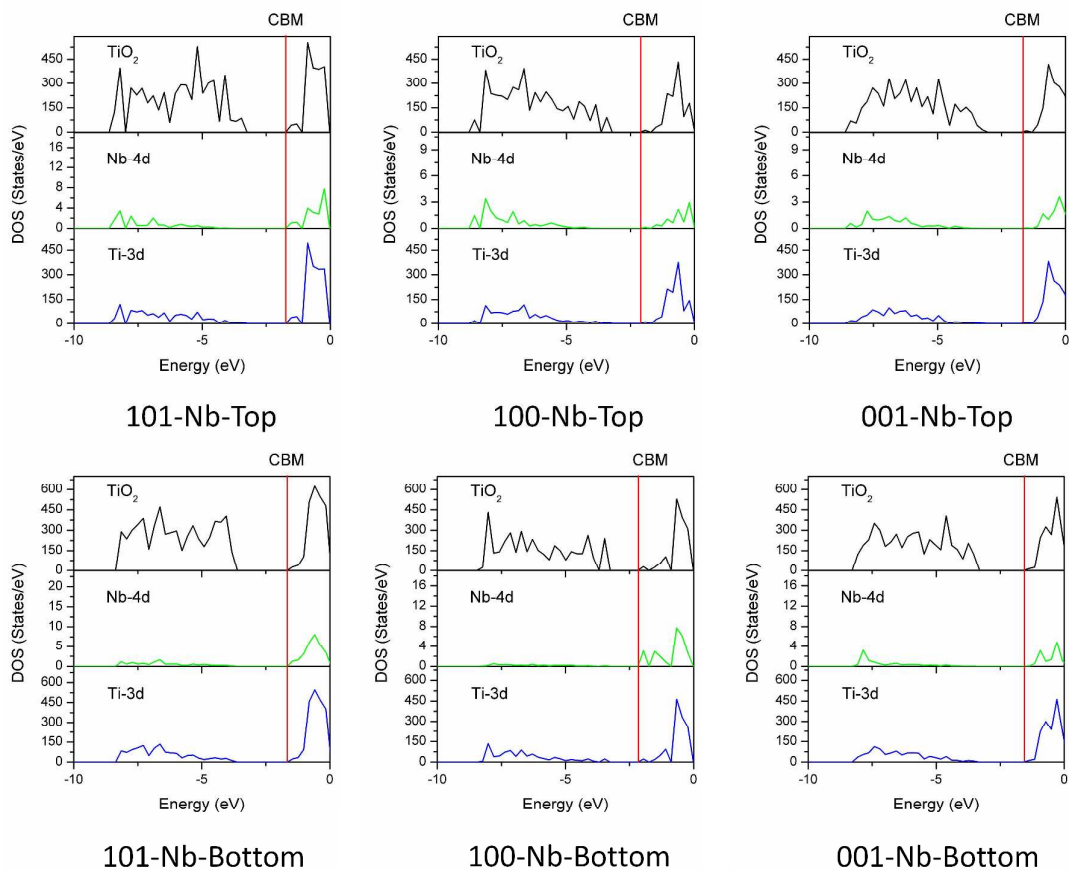

**Figure S3.** The density of states (DOS) of Nb-doped anatase  $\text{TiO}_2$  and its partial DOS of Ti  $3d$  and Nb  $4d$ .

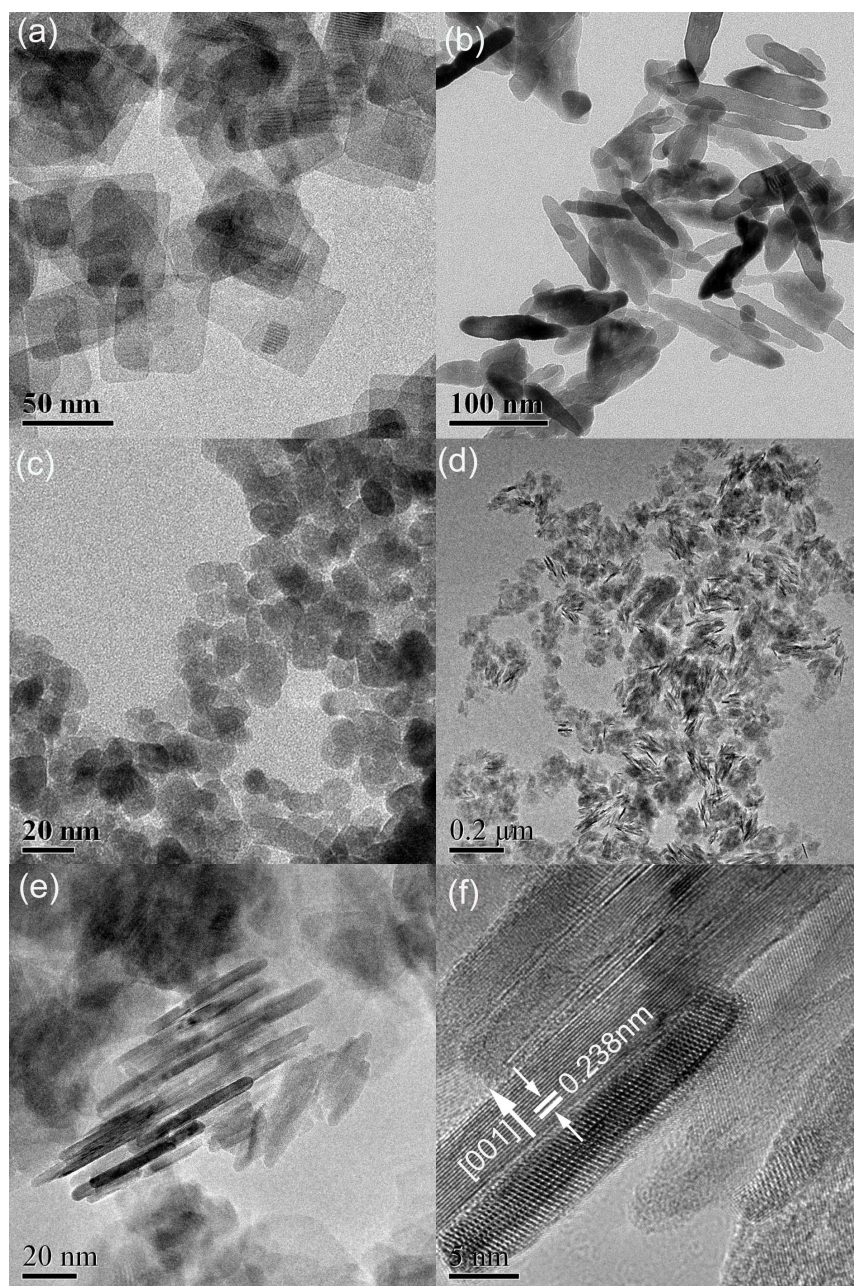

**Figure S4** (a) TEM image of (001) nanosheets. (b) TEM image of (100) nanosheets. (c) TEM image of Nb-doped (101) nanoparticles. HRTEM of Nb-doped (001)-oriented  $\text{TiO}_2$  nanosheets, (d), (e) and (f).

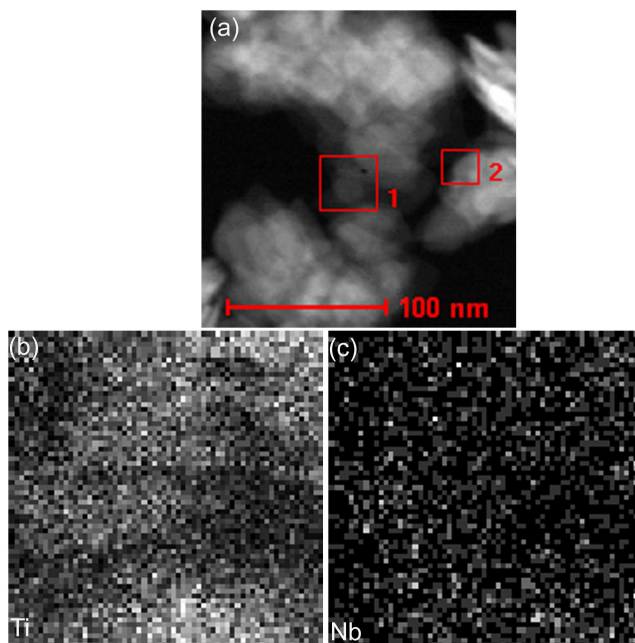

**Figure S5** (a) Dark-field STEM image of Nb-doped (001) TiO<sub>2</sub> nanosheets. (b) The corresponding elemental mapping of Ti atoms. (c) The corresponding elemental mapping of Nb atoms.

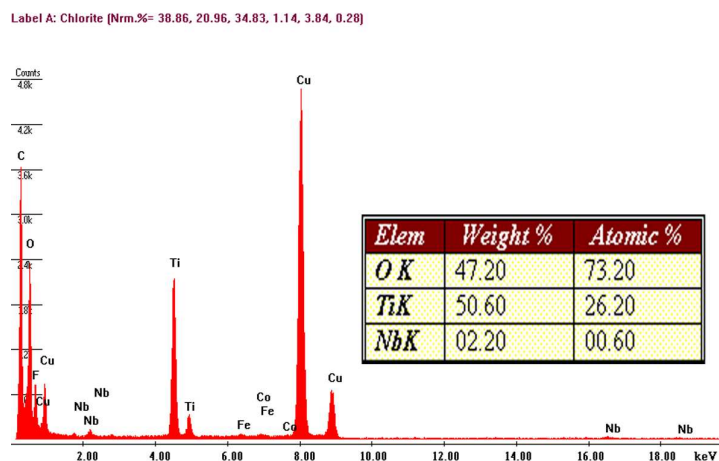

**Figure S6** The EDS image of Nb-doped (001)-oriented TiO<sub>2</sub> nanosheets.



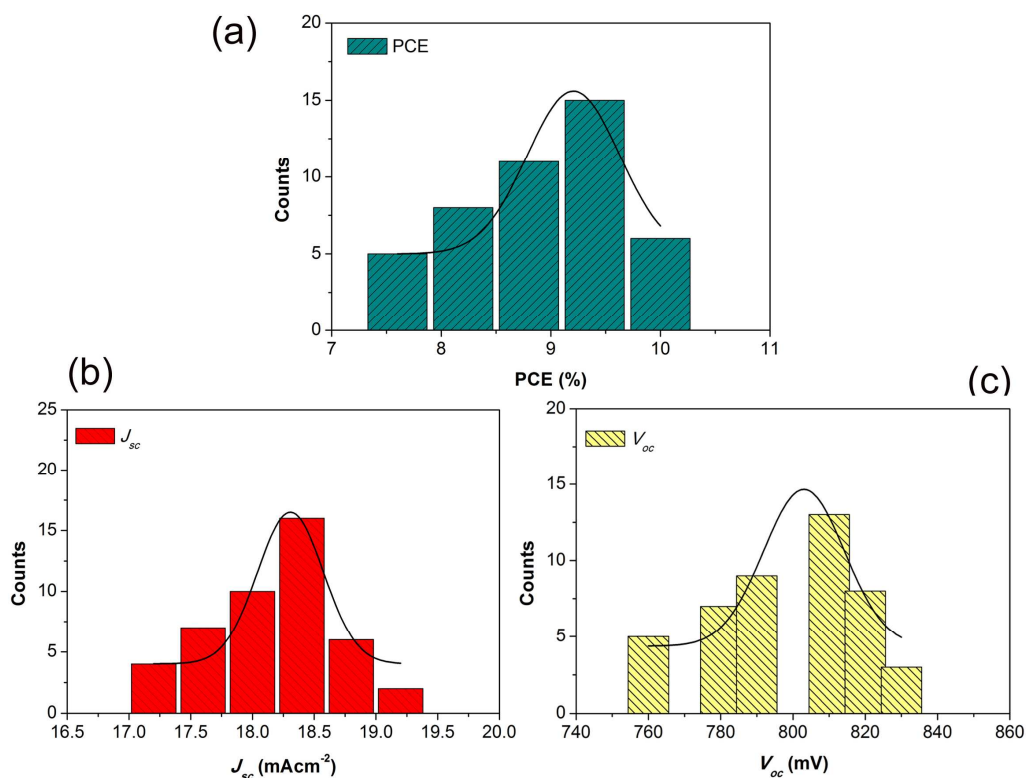

**Figure S7** (a) Histogram plots of solar photo-conversion efficiency (PCE) for a large batch of devices (total of 45 devices) based on Nb-doped (001)  $\text{TiO}_2$  nanosheets electrodes. The total of DSSCs based on Nb-doped (001)  $\text{TiO}_2$  nanosheets have been made 45 devices, and the photo-conversion efficiency ( $\eta$ ) more than 9% have 21 devices. (b), (c) distribution histogram of the open-circuit photovoltage and short-circuit photocurrent density.

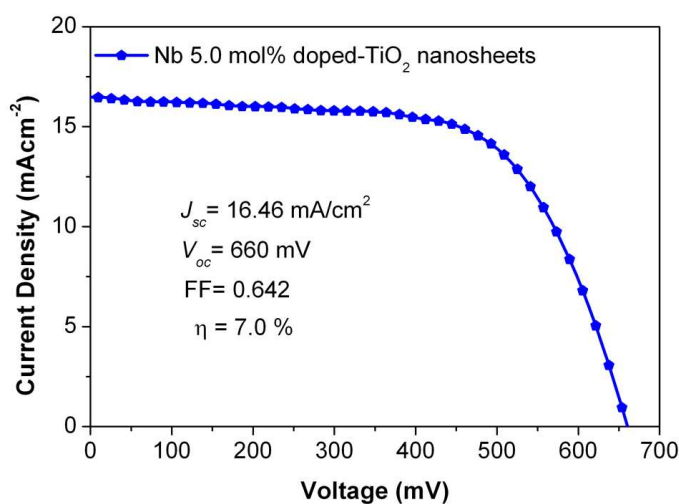

**Figure S8**  $J$ - $V$  curves of dye-sensitized solar cells based on Nb 5.0 mol% doped (001)- $\text{TiO}_2$  electrodes.
